# Supplementary material
Source: publisher figshare collection journal article supplement (https://springernature.figshare.com/ndownloader/files/23040017)
Supplement: Supplementary file 1 [file 23040017]

Additional File 3: Institutional subscriptions

Description: Here, we provide details of institutional subscriptions for the databases to be used to carry out searches.

| **Database Name** | **Subscription** | **Details** |
| --- | --- | --- |
| Scopus | Carleton University [As of Jan 25 2019] | A multidisciplinary abstract and citation database of research literature and web sources.  Provides worldwide coverage available of scientific, technical, medical and social sciences literature.  More than half of Scopus content originates from Europe, Latin America and the Asia Pacific region.  Also a good source of patent information.  Updated daily.  **Date Coverage:**Some article backfiles and their cited references from 1970-  **Fulltext:**No |
| Web of Science Core Collection | Carleton University [As of Jan 25 2019] | A multidisciplinary index of citations to articles in the sciences, social sciences and humanities.  Useful for finding journal articles published on a topic or to discover who has cited a particular author and/or paper.  Consists of:   - Science Citation Index Expanded (1900 - present) - Social Sciences Citation Index (1956 - present) - Arts & Humanities Citation Index (1975 - present) - Conference Proceedings Citation Index - Science (1990 - present) - Conference Proceedings Citation Index - Social Science and Humanities (1990 - present) - Book Citation Index - Science & Social Science (2008 - present) - Current Chemical Reactions (2008 - present) - Index Chemicus (2008 - present)   Part of the larger [Web of Science](https://library.carleton.ca/find/databases/web-knowledge).  **Fulltext:**No |
| ProQuest Dissertations and Theses Global | Carleton University [As of Jan 25 2019] | ProQuest Dissertations & Theses Global is a comprehensive collection of dissertations and theses from around the world, spanning from 1743 to the present. PQDT Global includes theses from Great Britain and Ireland.  Note: All Carleton theses from 1961 to the present are available in full text online. This database is based on theses microfilmed by the National Library of Canada. In any given year, there are theses which can not be microfilmed for a number of reasons, including: missing pages, paper work not filled out correctly or submitted, etc. For those theses, you will need to consult the print version in the Library.  **Date Coverage:** Indexing 1743 - present; Full text 1997 - present  **Fulltext:** Yes |
